# Supplementary material for: TAB1 binding induced p38α conformation change: an accelerated molecular dynamics simulation study
Source: Royal Society of Chemistry journal article supplement (doi:10.1039/d2cp00144f), 2022-01-01
Supplement: d2cp00144f1.pdf [file d2cp00144f1.pdf]

## Supplemental Information

# TAB1 binding induced p38 $\alpha$ conformation change: an accelerated molecular dynamics simulation study

*Yongjian Zang,<sup>1</sup> He Wang,<sup>1</sup> Ying Kang,<sup>1</sup> Jianwen Zhang,<sup>1</sup> Xuhua Li,<sup>1</sup> Lei Zhang,<sup>1</sup> Zhiwei Yang,<sup>\*1</sup>  
Shengli Zhang<sup>\*1</sup>*

---

<sup>1</sup> MOE Key Laboratory for Nonequilibrium Synthesis and Modulation of Condensed Matter, School of Physics, Xi'an Jiaotong University, Xi'an 710049, China

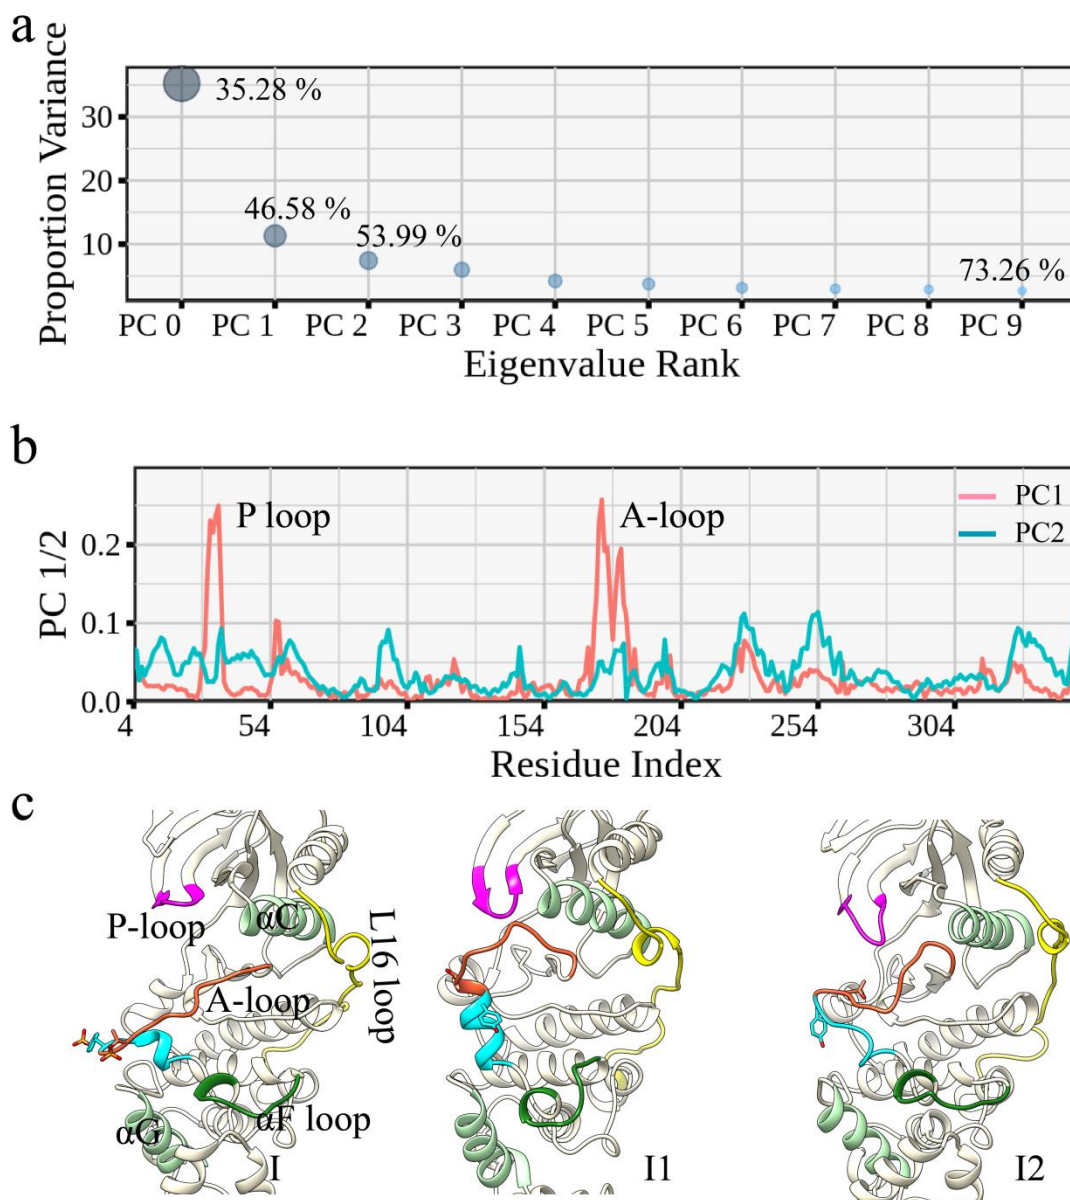

**Fig. S1** (a) The 10 of the 684 PCs capture approximately 70% of the p38 $\alpha$  motion in pp38 $\alpha$ -TAB1 simulation. (b) The contribution of each residue to first two PCs is displayed. (c) Representative conformations of p38 $\alpha$  in apo p38 $\alpha$  simulation (I1), p38 $\alpha$ -TAB1 simulation (I2), the pp38 $\alpha$ -TAB1 simulation (I).

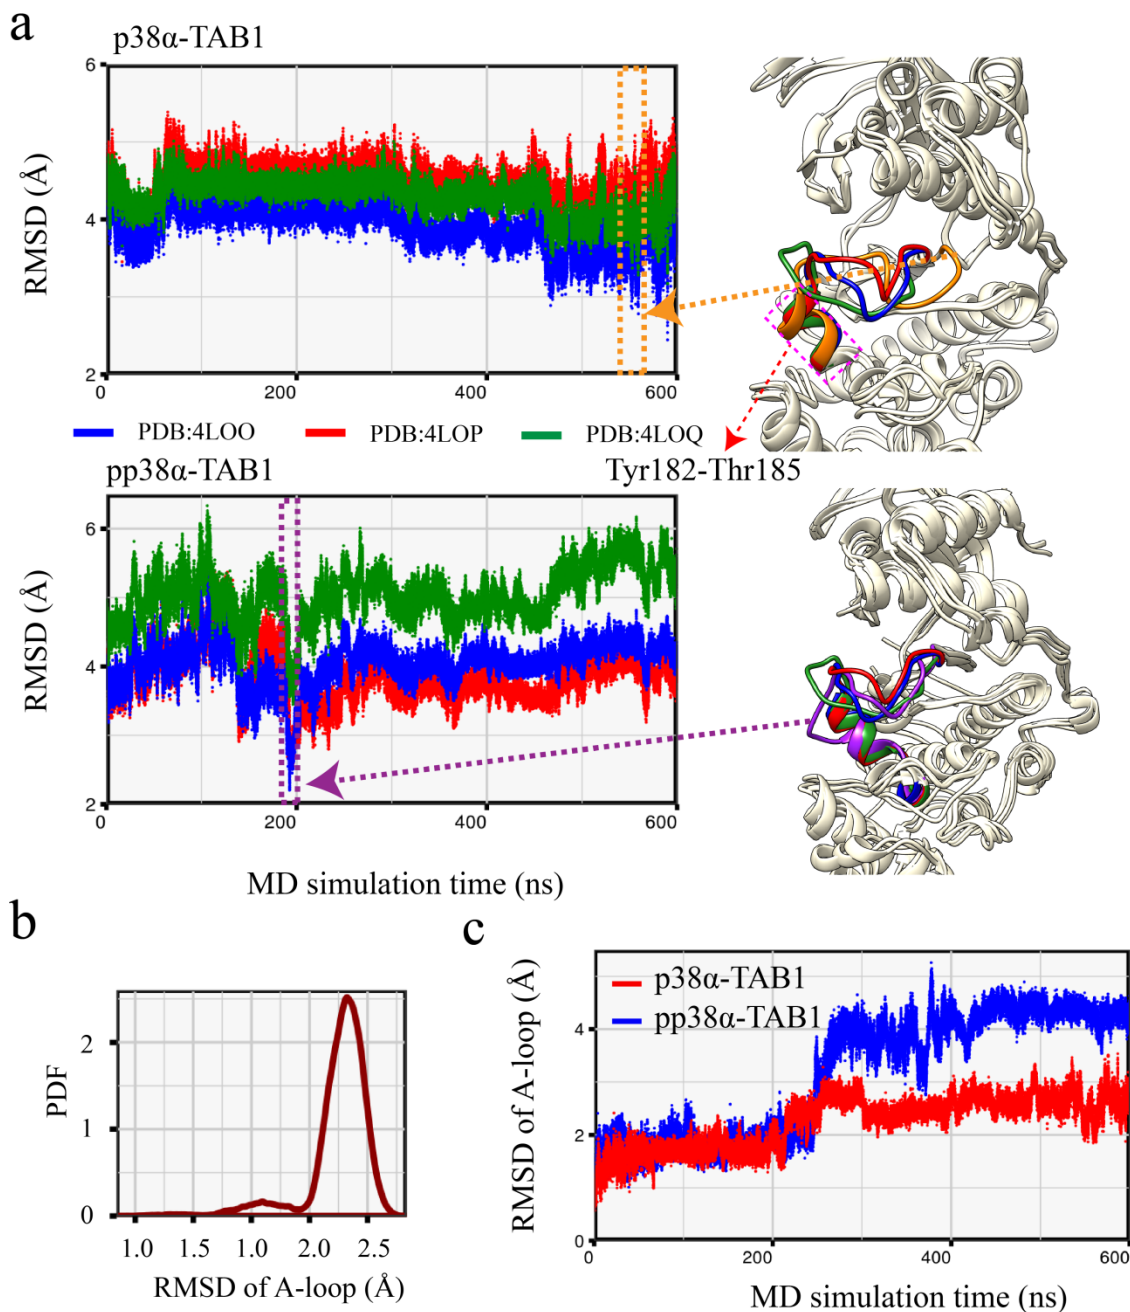

**Fig. S2** (a) The root-mean-square deviation (RMSD) of p38 $\alpha$  A-loop in p38 $\alpha$ -TAB1 and pp38 $\alpha$ -TAB1 simulations referenced to the crystal structure (PDB:4LOO, PDB:4LOP, PDB:4LOQ). The representative structures are given. (b) Probability distribution function (PDF) of the root-mean-square deviation (RMSD) of the A-loop in pp38 $\alpha_{4LOO}$ -TAB1 simulations. (c) The RMSD of p38 $\alpha$  A-loop in p38 $\alpha$ -TAB1 and pp38 $\alpha$ -TAB1 simulations referenced to the inactive p38 $\alpha$  kinase.

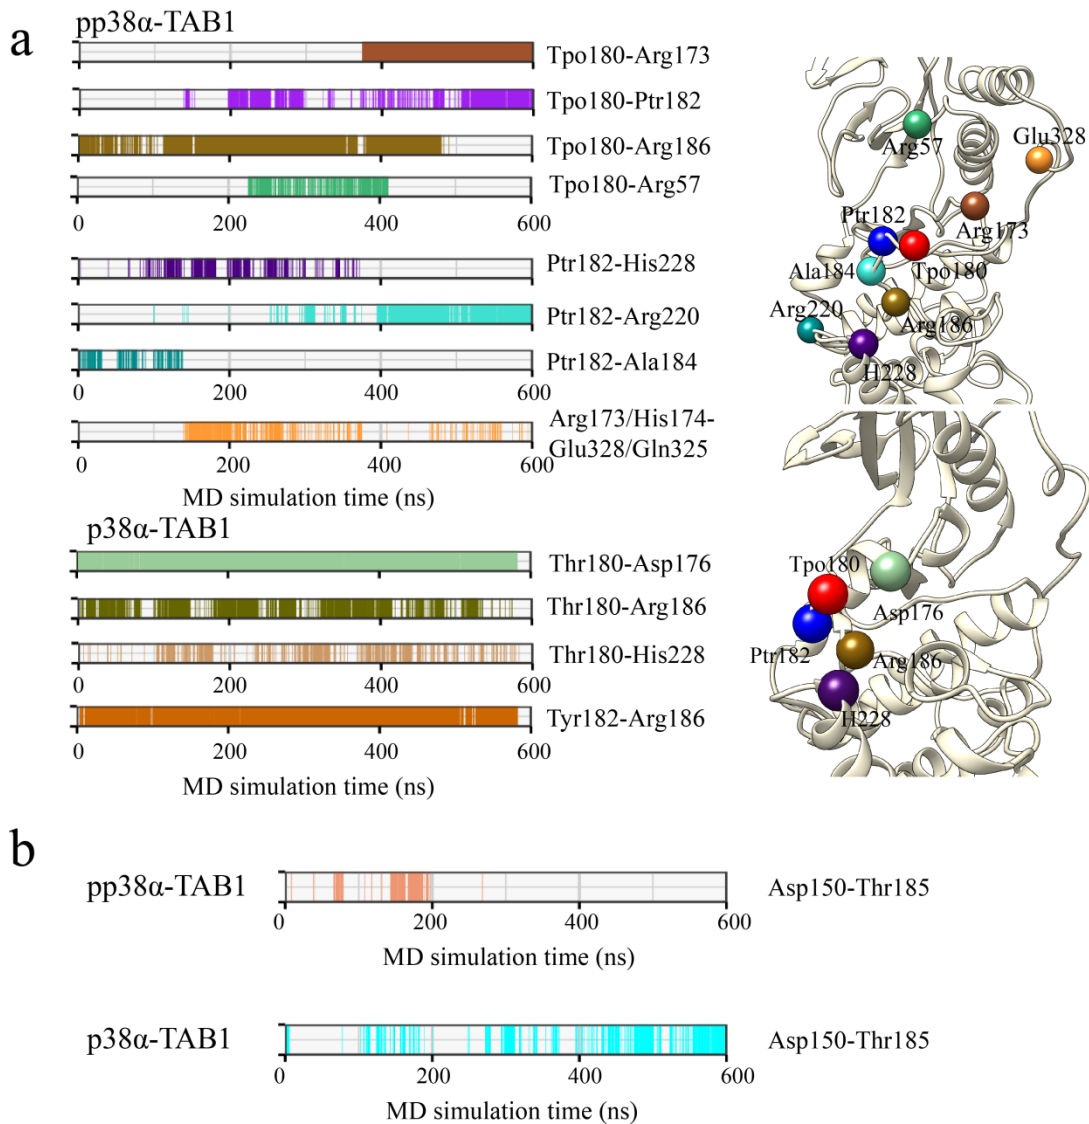

**Fig. S3** (a) Hydrogen bond networks of Thr/Tpo180 and Tyr/Ptr182 in p38 $\alpha$ -TAB1 and pp38 $\alpha$ -TAB1 simulations. (b) The hydrogen bond between Asp150 and Thr185 during simulation of p38 $\alpha$ -TAB1 and pp38 $\alpha$ -TAB1 systems.

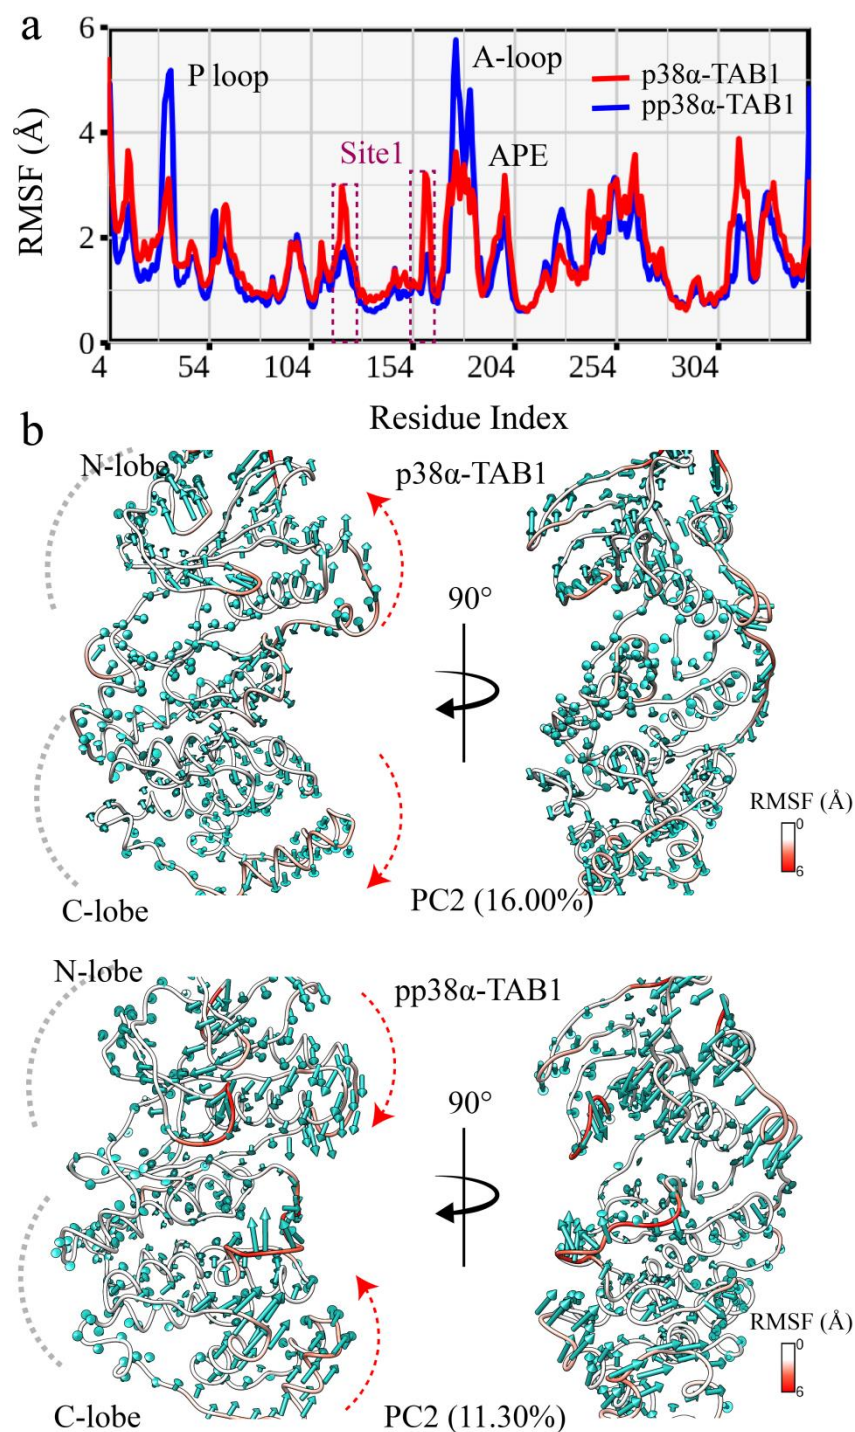

**Fig. S4** (a) The root-mean-square fluctuation (RMSF) per residue for p38 $\alpha$  in p38 $\alpha$ -TAB1 and pp38 $\alpha$ -TAB1 simulations. (b) Vector field representations of the second principal component (PC) obtained from p38 $\alpha$  of p38 $\alpha$ -TAB1 simulation and pp38 $\alpha$ -TAB1 simulation. The colors of residues are in accordance with the RMSFs values (units in Å).

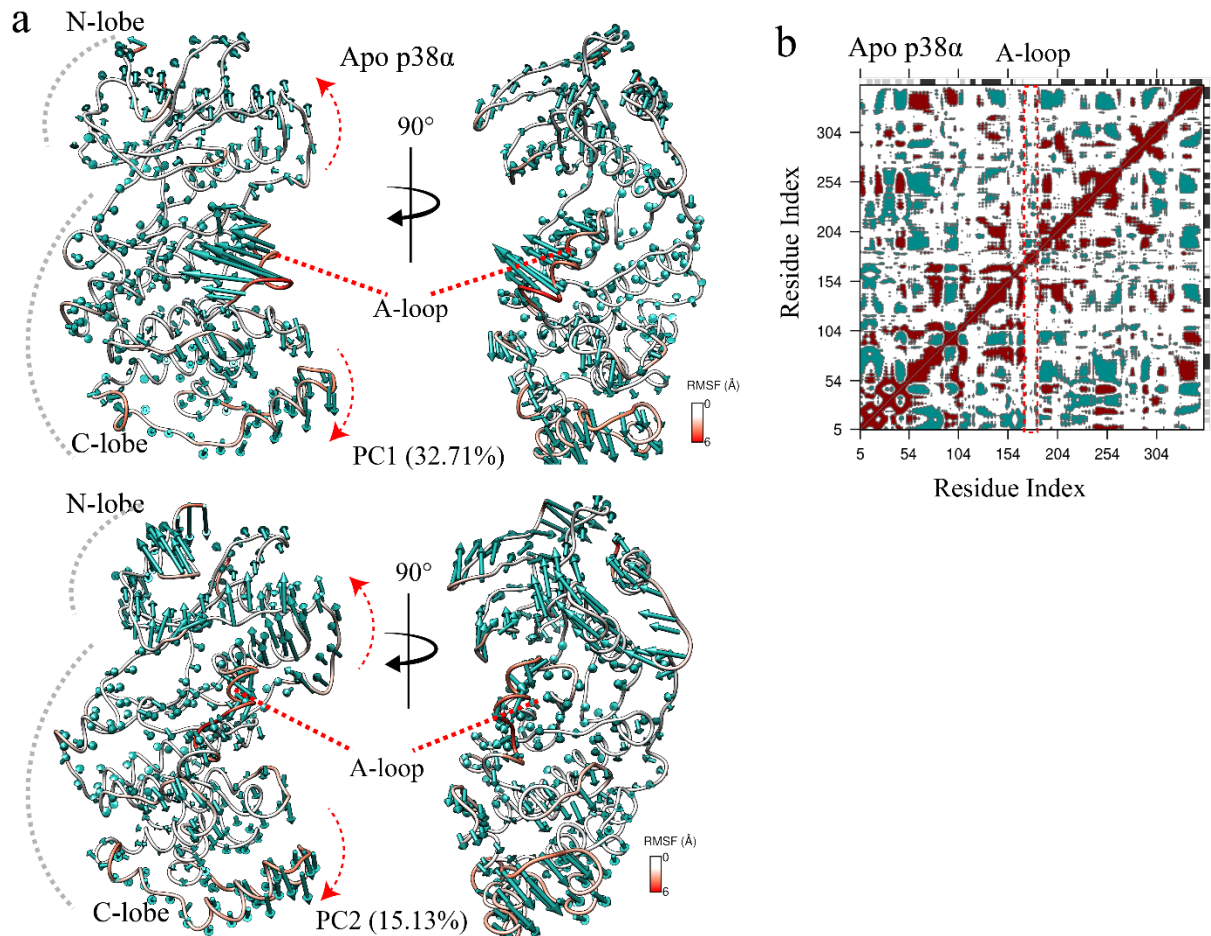

**Fig. S5** (a) Dynamic cross-correlation maps for p38 $\alpha$  kinase in apo p38 $\alpha$  simulation. Correlation values range from  $-1$  to  $+1$ , with positive values (dark red) indicating that two residues are correlated and negative values (light sea blue) indicating that they are anti-correlated. (b) Vector field representations of the first two principal components (PCs) obtained from apo p38 $\alpha$  simulation. The colors of the residues indicate the root-mean-square fluctuation (RMSF) values (units in Å).

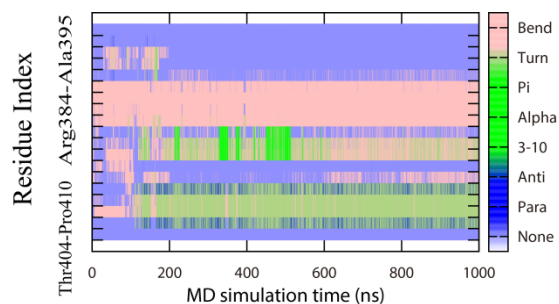

**Fig. S6** The time evolution of secondary structures (structures defined using the dictionary of the secondary structure of proteins (DSSP)) of the disordered fragment of TAB1 during pp38 $\alpha$ -TAB1 simulation.

The key structural of p38 $\alpha$  differences between active and inactive states are the changes in the unfolding of the A-loop. The A-loop RMSD value of the sampling structures in our simulation is  $\sim 4.5$  Å compared to inactive state. The following figures show the difference among the intermediate states sampling in our simulation, inactive state, and active state.

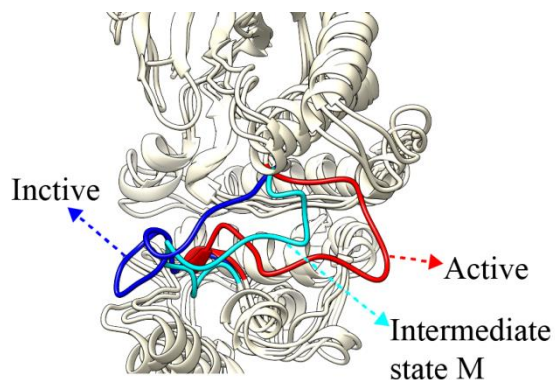

**Fig. S7** Superposition of the three p38 $\alpha$  structures, including the inactive state (A-loop in blue), active state (A-loop in red), and the intermediate state M (A-loop in cyan).

We extend the simulation time of the apo p38 $\alpha$ , p38 $\alpha$ -TAB1, pp38 $\alpha$ -TAB1 and pp38 $\alpha$ -TAB1 systems to 1000 ns. The RMSD of the three systems was recalculated and shown in the following figure. The RMSD values reached a plateau with minor variations after  $\sim$ 400 ns. Such motion suggests that the 600 ns simulation is sufficient for obtaining the stability of each system.

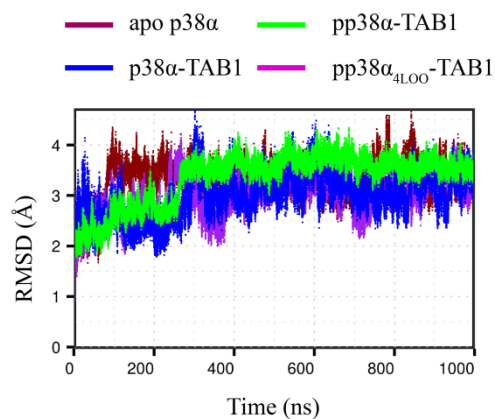

**Fig. S8** The root-mean-square deviation (RMSD) of backbone atom of the apo p38 $\alpha$ , p38 $\alpha$ -TAB1, pp38 $\alpha$ -TAB1 and pp38 $\alpha$ -TAB1 simulations over the 1000 ns MD trajectories.
